# Supplementary material for: Where are pedestrians injured and killed on Kampala city's road network?
Source: Frontiers journal article supplement (doi:10.3389/frsc.2022.838186), 2022-08-10
Supplement: Table_1.docx [file Table_1.docx]

**List of locations not precise enough for characterization but reporting 10 or more crashes**

| **Pedestrian crash location as reported by police** | **Number of fatal crashes** | **Number of serious crashes** | **Total number of serious and fatal crashes** |
| --- | --- | --- | --- |
| Kampala road | 2 | 94 | 96 |
| Queens way | 21 | 70 | 91 |
| Ben Kiwanuka street | 3 | 62 | 65 |
| Namirembe | 3 | 38 | 41 |
| Salaama | 3 | 33 | 36 |
| Kyaggwe road | 1 | 33 | 34 |
| Nakawa | 0 | 30 | 30 |
| Buganda road | 1 | 28 | 29 |
| Burton street | 0 | 28 | 28 |
| Jinja road | 2 | 26 | 28 |
| Nakawa fly-over | 4 | 24 | 28 |
| Kafumbe Mukasa | 3 | 23 | 26 |
| Kalerwe | 4 | 22 | 26 |
| Bombo road | 0 | 25 | 25 |
| Northern bypass | 11 | 14 | 25 |
| Kyebando Northern bypass | 11 | 12 | 23 |
| Najjanankumbi-Entebbe road | 2 | 21 | 23 |
| Northern bypass-Bwaise | 7 | 16 | 23 |
| William street | 1 | 22 | 23 |
| Kamwokya | 2 | 20 | 22 |
| Kabusu | 2 | 19 | 21 |
| Kalerwe fly-over-Northern bypass | 11 | 10 | 21 |
| Kansanga | 2 | 18 | 20 |
| Namungoona | 6 | 16 | 19 |
| Rubaga road | 1 | 18 | 19 |
| Kinawataka | 3 | 15 | 18 |
| Nakivubo | 1 | 17 | 18 |
| Nsambya | 3 | 14 | 17 |
| Kyambogo | 0 | 16 | 16 |
| Mackay road | 5 | 11 | 16 |
| Mukwano road | 0 | 16 | 16 |
| Ndeeba | 2 | 14 | 16 |
| Sir Apollo Kaggwa road | 3 | 13 | 16 |
| Bwaise Bombo road | 4 | 12 | 16 |
| Nakulabye | 1 | 14 | 15 |
| Kisugu | 2 | 12 | 14 |
| Northern bypass-Kiwatule | 2 | 12 | 14 |
| Yusuf Lule road | 1 | 13 | 14 |
| Nsooba fly over | 0 | 14 | 14 |
| Busega | 0 | 13 | 13 |
| Kisenyi | 3 | 10 | 13 |
| Kyebando | 5 | 8 | 13 |
| Luwum street | 0 | 13 | 13 |
| Nalukolongo | 3 | 10 | 13 |
| Kasubi | 0 | 13 | 13 |
| Kabalagala | 1 | 11 | 12 |
| Kiwatule | 2 | 10 | 12 |
| Kikuubo | 0 | 11 | 11 |
| Kisaasi | 4 | 7 | 11 |
| Luwafu | 2 | 9 | 11 |
| Market street | 2 | 9 | 11 |
| Ring road-Kibuye | 0 | 11 | 11 |
| Dastur street | 0 | 10 | 10 |
| Musajjalumbwa road | 1 | 9 | 10 |
| Nkrumah road | 1 | 9 | 10 |
| Lukuli | 1 | 9 | 10 |
| Fly over-Queens way | 4 | 6 | 10 |
| Mubarak-Makindye | 0 | 10 | 10 |
